# Supplementary material for: A comparison of different methods for handling measurements affected by medication use
Source: bioRxiv or medRxiv preprint supplement (doi:10.1101/2022.04.23.22273899), 2022-04-27
Supplement: Supplementary file [file media-2.pdf]

## Supplementary Material 2: Detailed application of the methods

### 1) Covariates used for inverse probability weighting [M7] and the imputation methods [M11-M13]

Sex, age, BMI, total body fat, waist circumference, hip circumference, education level, income, smoking status, ethnicity, alcohol intake, total amount of leisure, glucose, insulin, glycated hemoglobin A1C, triglycerides, HDL cholesterol, LDL cholesterol and medication use for glucose, lipid and depression.

### 2) R syntax for censored normal imputation [M12]

```
# Function to draw from a truncated normal distribution, range lwb-upb
```

```
rnorm.trunc <- function(n,mean,sd, low=-Inf, upp=Inf)
```

```
{U <- runif(n,0,1)
```

```
qnorm(pnorm(low, mean = mean, sd = sd)+
```

```
  (pnorm(upp, mean = mean, sd = sd)-pnorm(low, mean = mean, sd = sd))*U, mean = mean, sd =  
sd)
```

```
}
```

```
# impute censored normal
```

```
mice.impute.censnorm <-
```

```
function (y, ry, x, wy = NULL,ycens, ...)
```

```
{
```

```
  #1 prepare data
```

```
  wy <- !ry # wy= TRUE indicates that value should be imputed
```

```
  x <- as.matrix(x)
```

```
  m <- ncol(x)+1
```

```
  # 2. estimate coefficients censored model
```

```
  fit <- survreg(Surv(ycens, ry) ~ x, dist='gaussian')
```

```
  beta <- coefficients(fit)
```

```
  sigma <- fit$scale
```

```
  # print(fit)
```

```
  #3. generate new beta and sigma for bayesian drawings
```

```
  df <- max(length(y[ry]) - ncol(x), 1)
```

```
rv <- t(chol((vcov(fit)[1:m,1:m])))
beta.star <- beta + rv %*% rnorm(ncol(rv))
sigma.star <- sqrt(df*sigma^2/rchisq(1, df))

#4. Draw new observations
mean.star <- cbind(1,x[wy, , drop = FALSE]) %*% beta.star
vec<- rnorm.trunc(nrow(mean.star),mean.star,sd=sigma.star, low=ycens[wy])
return(vec)
}
```
